# Supplementary material
Source: PubMed Central journal article supplement (PMC6518137)
Supplement: nmy107_supplemental_tables.pdf [file nmy107_supplemental_tables.pdf]

## Supplementary Data.

**Supplemental Table 1.** Search strategy for the MEDLINE database.

|                                                                                                                                             |     |                                                                                                                |     |                      |
|---------------------------------------------------------------------------------------------------------------------------------------------|-----|----------------------------------------------------------------------------------------------------------------|-----|----------------------|
| "dairy products"[MeSH]<br>OR<br>"dairy"<br>OR<br>"milk"<br>OR<br>"yogurt"<br>OR<br>Yoghurt<br>OR<br>"cheese"<br>OR<br>kefir<br>OR<br>butter | AND | "diabetes mellitus" [MeSH]<br>OR<br>diabetes<br>OR<br>DM<br>OR<br>"glucose intolerance"<br>OR<br>hyperglycemia | AND | meta<br>OR<br>review |
|---------------------------------------------------------------------------------------------------------------------------------------------|-----|----------------------------------------------------------------------------------------------------------------|-----|----------------------|

## Supplementary Data.

**Supplemental Table 2.** Covariates considered in the analysis of the cohorts included in the systematic reviews and meta-analyses.

| Reference, country                               | Covariates included in the analyses                                                                                                                                                                                                                                                                                                                                                 | Meta-analyses including each paper |
|--------------------------------------------------|-------------------------------------------------------------------------------------------------------------------------------------------------------------------------------------------------------------------------------------------------------------------------------------------------------------------------------------------------------------------------------------|------------------------------------|
| Choi et al. 2005, USA (S1)                       | Age, total energy intake, FH of DM, smoking status, BMI, hypercholesterolemia, hypertension, physical activity, alcohol intake, cereal fiber, trans FAs, PUFA: SFA ratio, glycemic load                                                                                                                                                                                             | 22-25, 29, 35-37                   |
| Montonen et al. 2005, Finland (S2)               | Age, sex, BMI, energy intake, smoking, FH of DM, geographic area                                                                                                                                                                                                                                                                                                                    | 9, 22, 23, 28, 38                  |
| Pittas et al. 2006, USA (S3)                     | Age, BMI, hypertension, FH of DM, smoking, physical activity, caffeine, alcohol, residence, SFAs, PUFAs, trans FAs, cereal fiber, Mg, GL, retinol, energy                                                                                                                                                                                                                           | 22, 23, 25                         |
| Liu et al. 2006, USA (S4)                        | Age, total energy intake, randomized treatment assignment, FH of DM, smoking status, BMI, hypercholesterolemia, hypertension, physical activity, hormones, alcohol, dietary fiber, total fat, GL                                                                                                                                                                                    | 9, 22-25, 27-29, 35-37             |
| van Dam et al. 2006, USA (S5)                    | Age, total energy intake, alcohol, BMI, smoking status, strenuous physical activity, FH of DM, education, coffee, sugar-sweetened soft drinks, processed meat, red meat, whole grains                                                                                                                                                                                               | 9, 22-25, 27-29, 35, 36            |
| Lecomte et al. 2007, France (S6)                 | FH of DM, BMI, TG, glucose at baseline                                                                                                                                                                                                                                                                                                                                              | 22, 29                             |
| Elwood et al. 2007, United Kingdom (S7)          | Age, smoking, BMI, social class                                                                                                                                                                                                                                                                                                                                                     | 9, 22-25, 27, 28, 35-37            |
| Vang et al. 2008, USA (S8)                       | Age, sex                                                                                                                                                                                                                                                                                                                                                                            | 9, 22, 28, 37                      |
| Villegas et al. 2009, China (S9)                 | Age, energy intake, BMI, WHR, smoking status, alcohol, physical activity, income, education, occupation, hypertension                                                                                                                                                                                                                                                               | 9, 22, 21, 25, 28, 36, 37          |
| Kirii et al. 2009, Japan (S10)                   | Age, area, BMI, FH of DM, smoking status, alcohol intake, history of hypertension, exercise frequency, coffee consumption, energy-adjusted Mg, total energy intake                                                                                                                                                                                                                  | 9, 22-25, 27-29, 37                |
| Malik et al. 2011, USA (S11)                     | Age, BMI, total energy, FH of DM, smoking status, physical activity, alcohol use, OC use, HRT, PUFA: SFA ratio, GL, cereal fiber, trans fat, processed meat, carbonated soft drinks, fruit drinks, coffee; mutual adjustment: high- and low-fat dairy products                                                                                                                      | 22, 23                             |
| Margolis et al. 2011, USA (S12)                  | Age, race-ethnicity, total energy intake, income, education, BMI, smoking, alcohol intake, FH of DM, HRT, SBP, DBP, physical activity, interaction of low-fat dairy 3 BMI, interaction of yogurt 3 times                                                                                                                                                                            | 9, 22-24, 27-29, 37                |
| Sluijs, et al. 2012, Europe (S13)                | Age; center, sex, BMI, education, smoking status, physical activity, intakes of alcohol, fruit and vegetables, red meat, processed meat, sugar-sweetened soft drinks, coffee, cereals, cereal products, energy                                                                                                                                                                      | 9, 22, 23, 27, 28                  |
| Struijk et al. 2012, Denmark (S14)               | Age, sex, intervention group, FH of DM, education, physical activity, smoking status, intakes of alcohol, whole-grain cereal, meat, fish, coffee, tea, fruit, vegetables, energy; change in diet from baseline to 5-y follow-up; waist circumference                                                                                                                                | 9, 22, 23, 27, 28                  |
| Louie et al. 2012, Australia (S15)               | Age, sex, smoking status, physical activity, GL, vegetable fiber, total energy, FH of DM2, SBP, BMI, HDL, total cholesterol, TG                                                                                                                                                                                                                                                     | 9, 22, 23, 27-29                   |
| Grantham et al. 2013, Australia (S16)            | Age, sex, energy intake, FH DM, education, physical activity, smoking status, TG, HDL cholesterol, SBP, waist circumference, hip circumference                                                                                                                                                                                                                                      | 9, 22, 23, 25, 27, 28              |
| von Ruesten et al. 2013, Germany (S17)           | Age, sex, smoking status, pack-years of smoking, alcohol, leisure-time physical activity, BMI, WHR, hypertension, high blood lipids, education, vitamin supplementation, total energy intake, other food groups                                                                                                                                                                     | 22                                 |
| Soedamah-Muthu et al. 2013, United Kingdom (S18) | Age, ethnicity, employment grade, smoking BMI, physical activity, FH of HD/hypertension, intakes of alcohol, fruit and vegetables, bread, meat, fish, coffee, tea, total energy                                                                                                                                                                                                     | 9, 22, 23, 27, 37                  |
| Chen et al. 2014, HPFS, USA (S19)                | Age (continuous), BMI (8 categories), total energy intake (quintiles), race, smoking, physical activity, alcohol consumption, FH of DM, hypertension, hypercholesterolemia, trans-fat intake, glycemic load, red processed meat intake, nuts intake, SSB intake, and coffee intake, and other dairy types for individual dairy types.                                               | 9, 27, 28                          |
| Chen et al. 2014, NHS I, USA (S19)               | Age (continuous), BMI (8 categories), total energy intake (quintiles), race, smoking, physical activity, alcohol consumption, menopausal status and menopausal hormone use, FH of DM, hypertension, hypercholesterolemia, trans-fat intake, glycemic load, red processed meat intake, nuts intake, SSB intake, and coffee intake, and other dairy types for individual dairy types. | 9, 27-29, 37                       |

BMI: body mass index; DBP: diastolic blood pressure; FA: fatty acid; FH of DM: family history of diabetes mellitus; GL: glycemic load; Hg: mercury; HPFS: Health Professional Follow-up Study; HRT: hormone replacement therapy; NHS: Nurses' Health Study I, NHS II: Nurses' Health Study II; OC: oral contraceptive; PUFA: polyunsaturated fatty acid; SBP: systolic blood pressure; SFA: saturated fatty acid; SSB: sugar-sweetened beverage; TG: triacylglycerol; WHR: waist-to-hip ratio.

## Supplementary Data.

**Supplemental Table 2.** Covariates considered in the analysis of the cohorts included in the systematic reviews and meta-analyses (continued)

| Reference, country                                 | Covariates included in the analyses                                                                                                                                                                                                                                                                                                                                                                         | Meta-analyses including each paper |
|----------------------------------------------------|-------------------------------------------------------------------------------------------------------------------------------------------------------------------------------------------------------------------------------------------------------------------------------------------------------------------------------------------------------------------------------------------------------------|------------------------------------|
| Chen et al. 2014, NHS II, USA (S19)                | Age (continuous), BMI (8 categories), total energy intake (quintiles), race, smoking, physical activity, alcohol consumption, menopausal status and menopausal hormone use, oral contraceptive use, FH of DM, hypertension, hypercholesterolemia, trans-fat intake, glycemic load, red processed meat intake, nuts intake, SSB intake, and coffee intake, and other dairy types for individual dairy types. | 9, 27-29, 37                       |
| Zong et al. 2013, China (S20)                      | Age, sex, region, smoking, family history of diabetes, BMI, and dietary fiber intake                                                                                                                                                                                                                                                                                                                        | 9, 27- 29, 37                      |
| Ericson et al. 2013, Sweden (S21)                  | Sex, smoking status, alcohol, consumption, leisure-time physical activity, BMI, waist-to-hip ratio, hypertension, history of high blood lipid, levels at baseline, education, vitamin, supplementation, non-consumption of the respective food group, total energy intake (kJ/day).                                                                                                                         | 23, 29                             |
| Diaz-Lopez et al. 2015, Spain (S22)                | Age, sex, BMI, dietary intervention group, leisure time physical activity, education level, smoking, hypertension or antihypertensive use, fasting glucose, HDL cholesterol, triglycerides, and intake of vegetables, legumes, fruits, cereals, meat, fish, olive oil, nuts, alcohol and alcohol squared in g/d                                                                                             | 9, 24, 28, 29, 37                  |
| Ericson et al. 2015, Sweden (S23)                  | Age, sex, method version, season, total energy intake, leisure-time physical activity, smoking, alcohol intake, education, and BMI                                                                                                                                                                                                                                                                          | 9, 28, 38                          |
| Fuhrman et al. 2009, Puerto Rico (S24)             | None                                                                                                                                                                                                                                                                                                                                                                                                        | 28                                 |
| O'Connor et al. 2014, United Kingdom (S25)         | Age, sex, BMI, FH of DM, smoking, alcohol, physical activity, social class, education level, energy, fiber, fruit, vegetables, red meat, processed meat, and coffee intake                                                                                                                                                                                                                                  | 28, 29, 37                         |
| Nettleton et al. 2008, USA (S26)                   | Race, sex, age, study center, total energy intake, smoking status and pack years, physical activity, alcohol, coffee, tea, meat (red and processed), fish, whole grains, and BMI                                                                                                                                                                                                                            | 28                                 |
| Brouwer-Brolsma et al. 2016, The Netherlands (S27) | Age, sex, alcohol, smoking, education, physical activity, BMI, total energy intake, energy adjusted meat intake, energy adjusted fish intake, and potential intermediates: total cholesterol, HDL-cholesterol, C-reactive protein, hypertension                                                                                                                                                             | 9                                  |
| Moslehi et al. 2015, Iran (S28)                    | Age, sex, FH of DM, BMI, waist circumference, energy intake, blood pressure, triacylglycerol, cholesterol                                                                                                                                                                                                                                                                                                   | 9                                  |
| Buijsse et al. 2015, Multi-country (S29)           | Study center, energy intake, alcohol intake, gender, education, smoking status, physical activity, BMI                                                                                                                                                                                                                                                                                                      | 38                                 |
| Guasch-Ferre et al. 2015, USA (S30)                | Age, ethnicity, ancestry, smoking status, alcohol intake, dietary pattern (Alternative Healthy Eating Index score, and total energy intake, physical activity, FH of DM, history of hypertension, hypercholesterolemia, multivitamin use, postmenopausal status and menopausal hormone use.                                                                                                                 | 38                                 |

BMI: body mass index; DBP: diastolic blood pressure; FA: fatty acid; FH of DM: family history of diabetes mellitus; GL: glycemic load; Hg: mercury; HPFS: Health Professional Follow-up Study; HRT: hormone replacement therapy; NHS: Nurses' Health Study I, NHS II: Nurses' Health Study II; OC: oral contraceptive; PUFA: polyunsaturated fatty acid; SBP: systolic blood pressure; SFA: saturated fatty acid; SSB: sugar-sweetened beverage; TG: triacylglycerol; WHR: waist-to-hip ratio.

## Supplementary Data.

**Supplemental Table 3.** Search strategy for the MEDLINE database.

| Reference                     | 1 | 2 | 3 | 4 | 5 | 6 | 7 | 8 | 9 | 10 | 11 | 12 | 13 | 14 | 15 | 16 | Total | Risk of bias |
|-------------------------------|---|---|---|---|---|---|---|---|---|----|----|----|----|----|----|----|-------|--------------|
| Aune et al. 2013 (22)         | Y | Y | Y | Y | N | N | N | Y | N | N  | Y  | N  | N  | Y  | Y  | Y  | 9     | Good         |
| Chen et al. 2014 (27)         | Y | Y | Y | Y | N | N | N | Y | N | N  | Y  | N  | N  | Y  | Y  | Y  | 9     | Good         |
| Elwood et al. 2008 (35)       | Y | Y | Y | Y | N | N | N | Y | N | N  | Y  | N  | N  | Y  | N  | Y  | 8     | Acceptable   |
| Elwood et al. 2010 (36)       | Y | Y | Y | Y | N | N | N | Y | N | N  | Y  | N  | N  | Y  | N  | Y  | 8     | Acceptable   |
| Gao et al. 2013 (23)          | Y | Y | Y | Y | Y | Y | N | Y | Y | N  | Y  | Y  | Y  | Y  | Y  | Y  | 14    | Very good    |
| Gijsbers et al. 2016 (28)     | Y | Y | Y | Y | Y | Y | N | Y | Y | N  | Y  | N  | N  | Y  | Y  | Y  | 12    | Very good    |
| Khoramdad et al. 2016 (29)    | Y | Y | Y | Y | Y | Y | N | Y | Y | N  | Y  | Y  | Y  | Y  | Y  | Y  | 14    | Very good    |
| Khoramdad et al. 2016 (37)    | Y | Y | Y | Y | Y | Y | N | Y | Y | N  | Y  | Y  | Y  | Y  | Y  | Y  | 14    | Very good    |
| Pimpin et al. 2016 (38)       | Y | Y | Y | Y | N | Y | N | Y | Y | N  | Y  | Y  | Y  | Y  | Y  | Y  | 13    | Very good    |
| Schwingshackl et al. 2017 (9) | Y | Y | Y | Y | Y | Y | N | Y | Y | N  | Y  | Y  | Y  | Y  | Y  | Y  | 14    | Very good    |
| Tian et al. 2017 (24)         | Y | Y | Y | Y | N | N | N | Y | N | N  | Y  | N  | N  | Y  | Y  | Y  | 9     | Good         |
| Tong et al. 2011 (25)         | Y | Y | Y | Y | N | N | N | Y | N | N  | Y  | N  | N  | Y  | Y  | Y  | 9     | Good         |

N: no; y: yes

## Supplementary Data.

### Supplemental References

- S1. Choi HK, Willett WC, Stampfer MJ, Rimm E, Hu FB. Dairy consumption and risk of type 2 diabetes mellitus in men: a prospective study. *Arch Intern Med* 2005; 165: 997–1003.
- S2. Montonen J, Jarvinen R, Heliövaara M, Reunanen A, Aromaa A, Knekt P. Food consumption and the incidence of type II diabetes mellitus. *Eur J Clin Nutr* 2005; 59: 441–8.
- S3. Pittas AG, Dawson-Hughes B, Li T, van Dam RM, Willett WC, Manson JE, Hu FB. Vitamin D and calcium intake in relation to type 2 diabetes in women. *Diabetes Care* 2006; 29: 650–6.
- S4. Liu S, Choi HK, Ford E, Song Y, Klevak A, Buring JE, Manson JE. A prospective study of dairy intake and the risk of type 2 diabetes in women. *Diabetes Care* 2006; 29: 1579–84.
- S5. van Dam RM, Hu FB, Rosenberg L, Krishnan S, Palmer JR. Dietary calcium and magnesium, major food sources, and risk of type 2 diabetes in U.S. black women. *Diabetes Care* 2006; 29: 2238–43.
- S6. Lecomte P, Vol S, Caces E, Born C, Chabrolle C, Lasfargues G, Halimi G, Tichet J. Five-year predictive factors of type 2 diabetes in men with impaired fasting glucose. *Diabetes Metab* 2007; 33: 140–7.
- S7. Elwood PC, Pickering JE, Fehily AM. Milk and dairy consumption, diabetes and the metabolic syndrome: the Caerphilly prospective study. *J Epidemiol Community Health* 2007; 61: 695–8.
- S8. Vang A, Singh PN, Lee JW, Haddad EH, Brinegar CH. Meats, processed meats, obesity, weight gain and occurrence of diabetes among adults: findings from Adventist Health Studies. *Ann Nutr Metab* 2008; 52:96–104.
- S9. Villegas R, Gao YT, Dai Q, Yang G, Cai H, Li H, Zheng W, Shu XO. Dietary calcium and magnesium intakes and the risk of type 2 diabetes: the Shanghai Women’s Health Study. *Am J Clin Nutr* 2009; 89: 1059–67.
- S10. Kirii K, Mizoue T, Iso H, Takahashi Y, Kato M, Inoue M, Noda M, Tsugane S; Japan Public Health Center-based Prospective Study Group. Calcium, vitamin D and dairy intake in relation to type 2 diabetes risk in a Japanese cohort. *Diabetologia* 2009; 52: 2542–50.
- S11. Malik VS, Sun Q, van Dam RM, Rimm EB, Willett WC, Rosner B, Hu FB. Adolescent dairy product consumption and risk of type 2 diabetes in middle-aged women. *Am J Clin Nutr* 2011; 94: 854–61.

## Supplementary Data.

S12. Margolis KL, Wei F, de Boer IH, Howard BV, Liu S, Manson JE, Mossavar-Rahmani Y, Shikany JM, Tinker LF; Women's Health Initiative Investigators. A diet high in low-fat dairy products lowers diabetes risk in postmenopausal women. *J Nutr* 2011; 141: 1969–74.

S13. Sluijs I, Forouhi NG, Beulens JW, van der Schouw YT, Agnoli C, Arriola L, Balkau B, Barricarte A, Boeing H, Bueno-de-Mesquita HB, et al. The amount and type of dairy product intake and incident type 2 diabetes: results from the EPIC-InterAct Study. *Am J Clin Nutr* 2012; 96: 382–90.

S14. Struijk EA, Heraclides A, Witte DR, Soedamah-Muthu SS, Geleijnse JM, Toft U, Lau CJ. Dairy product intake in relation to glucose regulation indices and risk of type 2 diabetes. *Nutr Metab Cardiovasc Dis* 2013; 23(9): 822-8.

S15. Louie JC, Flood VM, Rangan AM, Burlutsky G, Gill TP, Gopinath B, Mitchell P. Higher regular fat dairy consumption is associated with lower incidence of metabolic syndrome but not type 2 diabetes. *Nutr Metab Cardiovasc Dis* 2013; 23(9): 816-21.

S16. Grantham NM, Magliano DJ, Hodge A, Jowett J, Meikle P, Shaw JE. The association between dairy food intake and the incidence of diabetes in Australia: the Australian Diabetes Obesity and Lifestyle Study (AusDiab). *Public Health Nutr* 2013; 16: 339–45.

S17. von Ruesten A, Feller S, Bergmann MM, Boeing H. Diet and risk of chronic diseases: results from the first 8 years of follow-up in the EPICPotsdam study. *Eur J Clin Nutr* 2013; 67: 412–9.

S18. Soedamah-Muthu SS, Masset G, Verberne L, Geleijnse JM, Brunner EJ. Consumption of dairy products and associations with incident diabetes, CHD and mortality in the Whitehall II study. *Br J Nutr* 2013; 109: 718–26.

S19. Chen M, Sun Q, Giovannucci E, Mozaffarian D, Manson JE, Willett WC, Hu FB. Dairy consumption and risk of type 2 diabetes: 3 cohorts of US adults and an updated meta-analysis. *BMC Med.* 2014; 12: 215.

S20. Zong G, Sun Q, Yu D, Zhu J, Sun L, Ye X, Li H, Jin Q, Zheng H, Hu FB, Lin X. Dairy consumption, type 2 diabetes, and changes in cardiometabolic traits: a prospective cohort study of middle-aged and older Chinese in Beijing and Shanghai. *Diabetes Care* 2014, 37: 56–63.

S21. Ericson U, Sonestedt E, Gullberg B, Hellstrand S, Hindy G, Wirfält, Orho-Melander M. High intakes of protein and processed meat associate with increased incidence of type 2 diabetes. *Br J Nutr* 2013; 109: 1143–53.

## Supplementary Data.

S22. Díaz-López A, Bulló M, Martínez-González MA, Corella D, Estruch R, Fitó M, Gómez-Gracia E, Fiol M, de la Corte FJG, Ros E, Babio N, Serra-Majem LI, Pintó X, Ángel Muñoz MA, Francés F, Buil-Cosiales P, Salas-Salvadó J. Dairy product consumption and risk of type 2 diabetes in an elderly Spanish Mediterranean population at high cardiovascular risk. *Eur J Nutr* 2016; 55: 349–360.

S23. Ericson U, Hellstrand S, Brunkwall L, E. Sonestedt, Wallström P, Gullberg B, Wirfält E, Orho-Melander M. Food sources of fat may clarify the inconsistent role of dietary fat intake for incidence of type 2 diabetes. *Am J Clin Nutr* 2015;101(5):1065-80.

S24. Fuhrman BJ, Smit E, Crespo CJ, Garcia-Palmieri MR. Coffee intake and risk of incident diabetes in Puerto Rican men: results from the Puerto Rico Heart Health Program. *Public Health Nutr* 2009; 12: 842–8.

S25. O'Connor LM, Lentjes MAH, Luben RN, Khaw K-T, Wareham NJ, Forouhi NG. Dietary dairy product intake and incident type 2 diabetes: a prospective study using dietary data from a 7-day food diary. *Diabetologia* 2014; 57: 909–17.

S26. Nettleton JA, Steffen LM, Ni H, Liu K, Jacobs DR Jr. Dietary patterns and risk of incident type 2 diabetes in the Multi-Ethnic Study of Atherosclerosis (MESA). *Diabetes Care* 2008; 31: 1777–82.

S27. Brouwer-Brolsma EM, van Woudenberg GJ, Oude Elferink SJ, et al. Intake of different types of dairy and its prospective association with risk of type 2 diabetes: The Rotterdam Study. *Nutr Metab Cardiovasc Dis* 2016; 26 (11): 987-95

S28. Moslehi N, Shab-Bidar S, Mirmiran P, Sadeghi M, Azizi F. Associations between dairy products consumption and risk of type 2 diabetes: Tehran lipid and glucose study. *Int J Food Sci Nutr*. 2015; 66(6): 692-9.

S29. Buijsse B, Boeing H, Drogan D, Schulze MB, Feskens EJ, Amiano P, et al. Consumption of fatty foods and incident type 2 diabetes in populations from eight European countries. *Eur J Clin Nutr*. 2015; 69 (4):455–61.

S30. Guasch-Ferre M, Hruby A, Salas-Salvado J, Martinez-Gonzalez MA, Sun Q, Willett WC, et al. Olive oil consumption and risk of type 2 diabetes in US women. *The American journal of clinical nutrition*. 2015; 102(2):479–86.
